# Supplementary material for: In Silico Workflow for the Discovery of Natural Products Activating the G Protein-Coupled Bile Acid Receptor 1
Source: PubMed Central journal article supplement (PMC6036132; doi:10.3389/fchem.2018.00242), 2018-07-02
Supplement: Data_Sheet_1.pdf [file Data_Sheet_1.pdf]

## Supplementary Material

# IN SILICO WORKFLOW FOR THE DISCOVERY OF NATURAL PRODUCTS ACTIVATING THE G PROTEIN-COUPLED BILE ACID RECEPTOR 1

Benjamin Kirchweger, Jadel M. Kratz, Angela Ladurner, Ulrike Grienke, Thierry Langer, Verena M. Dirsch, Judith M. Rollinger\*

\* Correspondence: judith.rollinger@univie.ac.at

### 1 Supplementary Figures

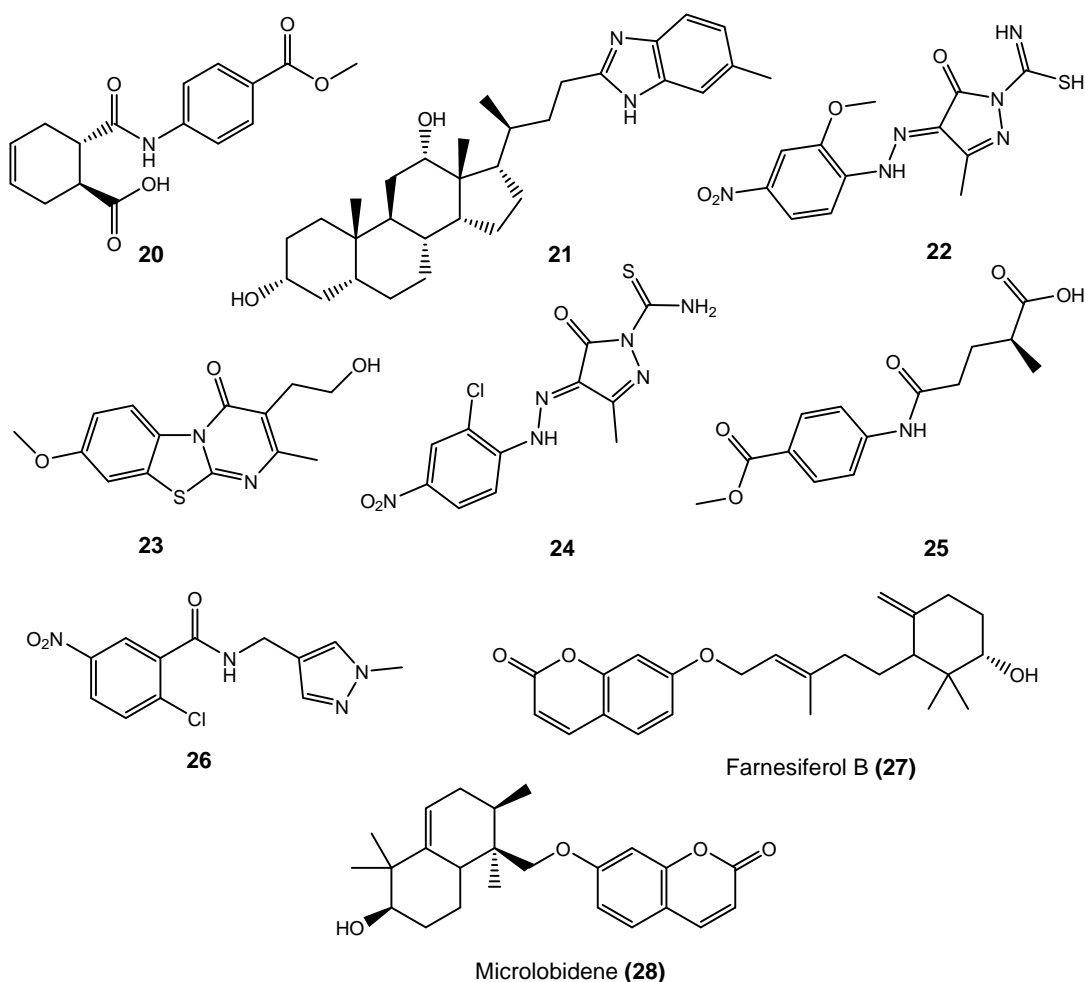

**Supplementary Figure 1.** Chemical structures of selected virtual hits from group 1; farnesiferol B (27) and microlobidene (28) are secondary plant metabolites, 20-26 are synthetic compounds obtained from SPECS.

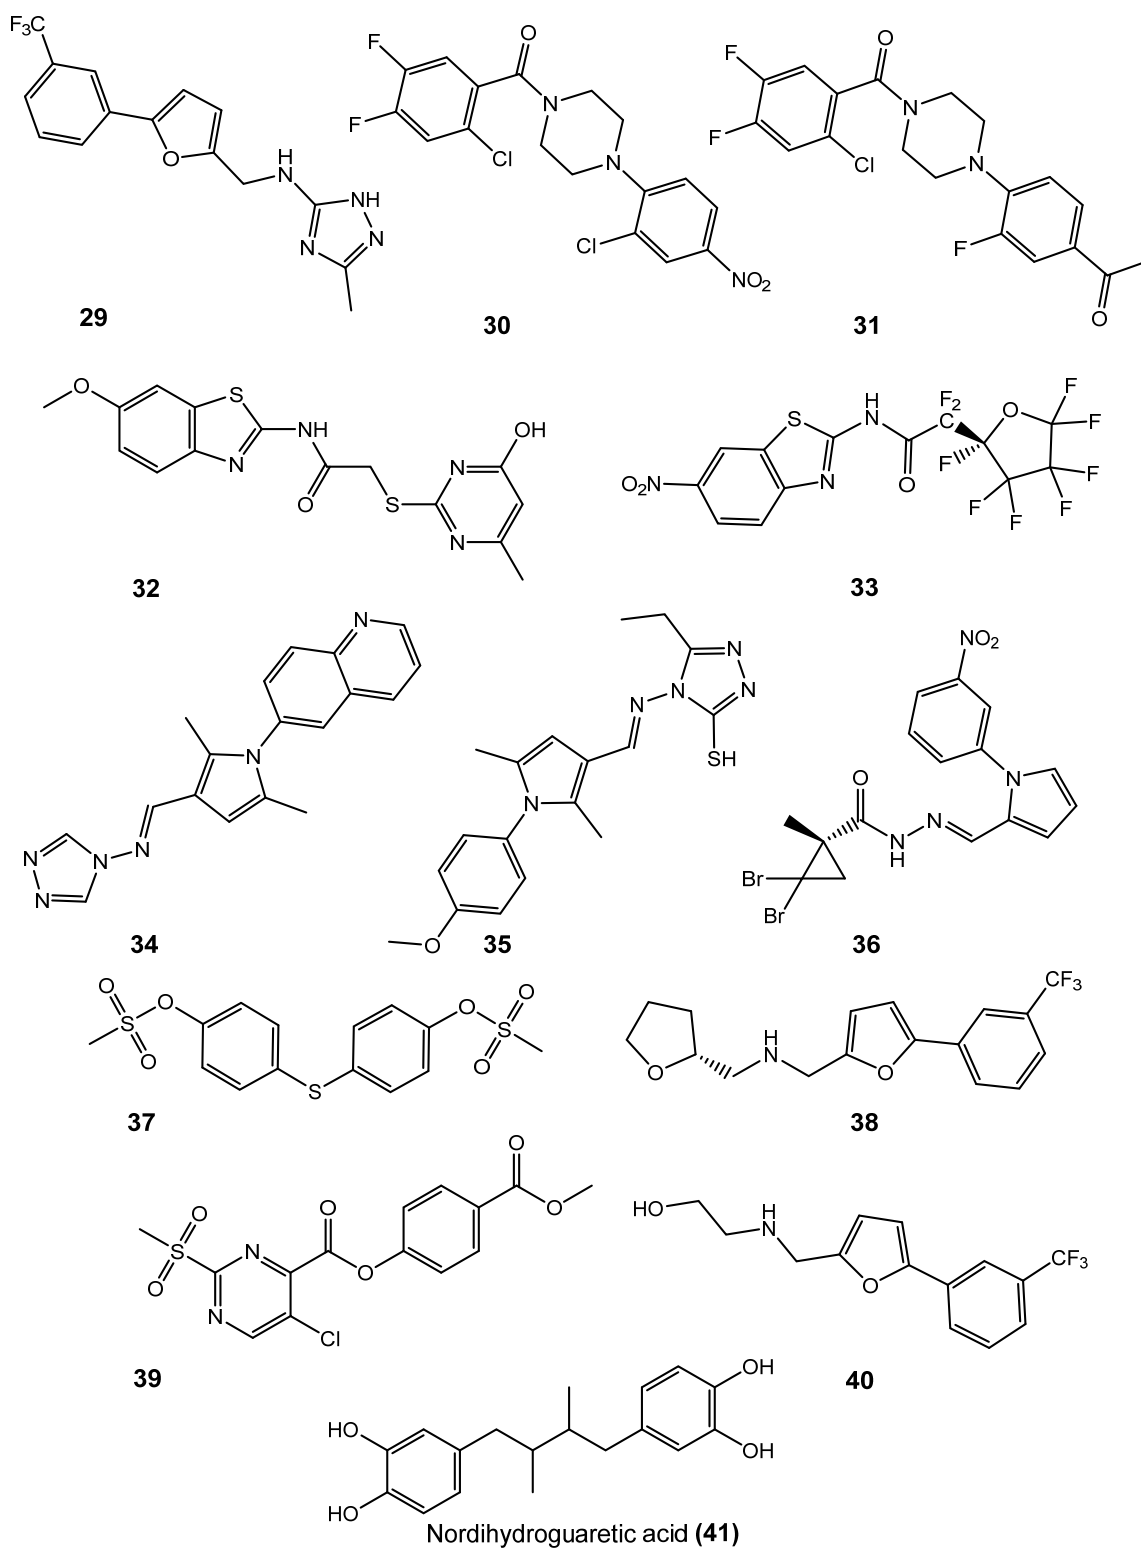

**Supplementary Figure 2.** Chemical structures of selected virtual hits from group 2; nordihydroguaretic acid (41) is a secondary plant metabolite, 29-40 are synthetic compounds obtained from SPECs.

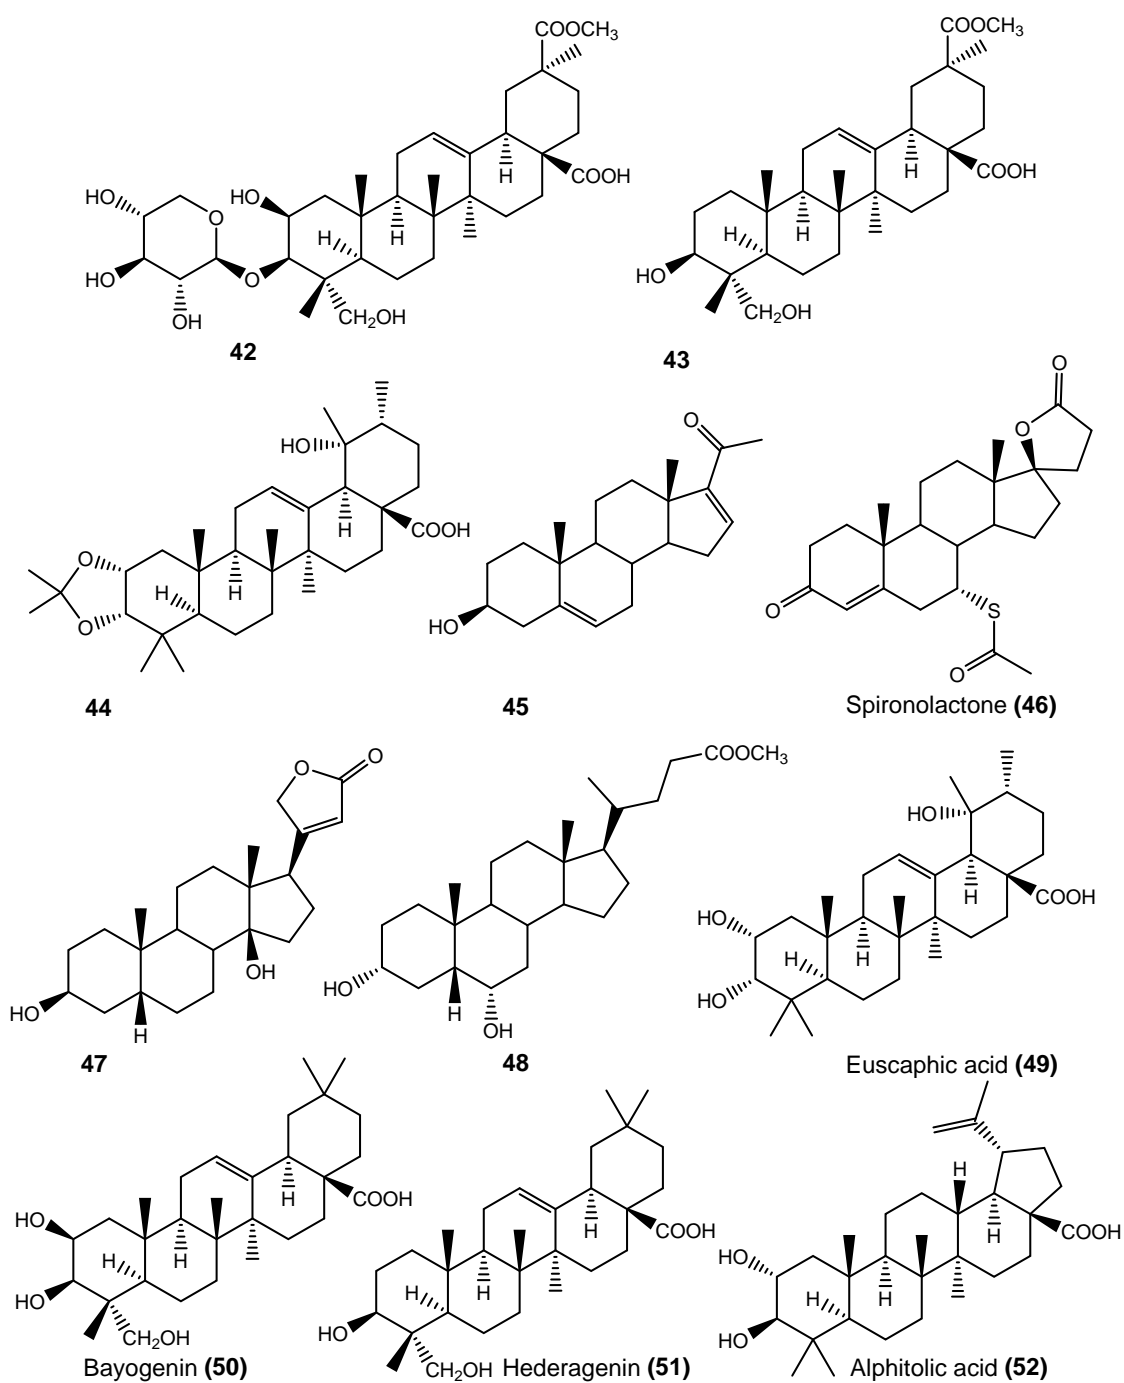

**Supplementary Figure 3.** Chemical structures of selected virtual hits from groups 4 to 9. Compounds **42** to **44** and **47** to **52** are secondary plant metabolites, **45** is a progesterone derivative and spironolactone (**46**) is an approved drug.

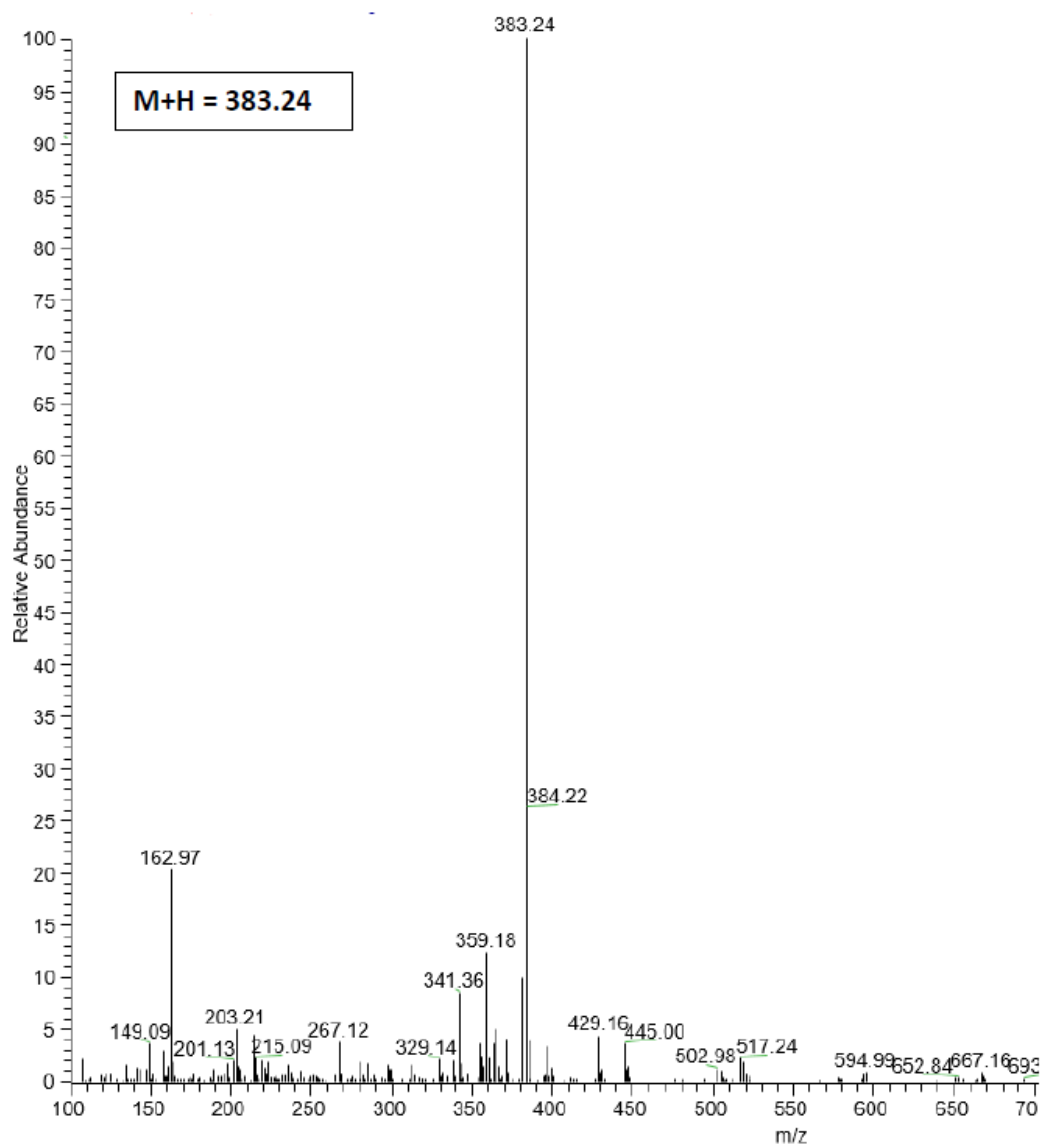

**Supplementary Figure 4.** MS data of microlobidene (**28**) (ThermoLTQiontrap; HESI; 275°C Capillary Temp; 300°C Source Heater Temp; Sheath Gas Flow 40.00; Aux Gas Flow 10.00; Sweep Gas Flow 10.00; Positive Source Voltage 3.70 kV; 100.00 uA Source Current; 18.00 V Capillary Voltage; 90.00 V Tube Lens)

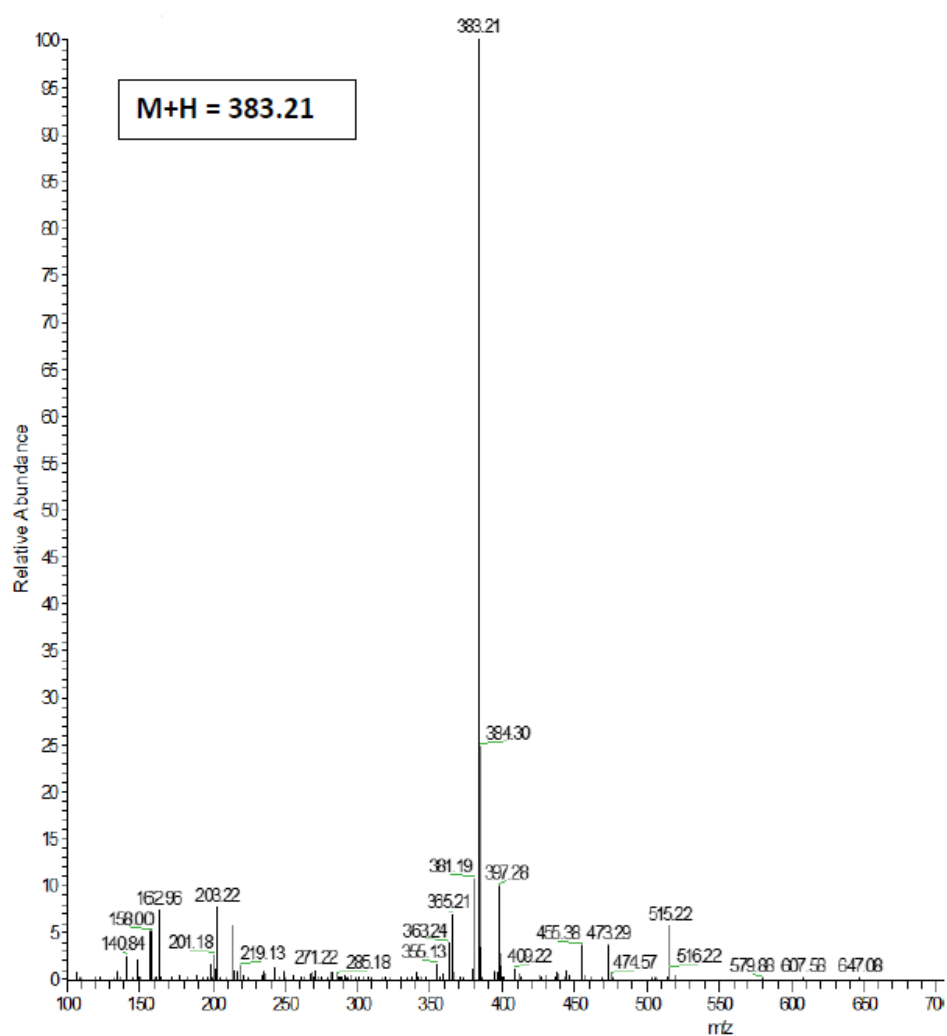

**Supplementary Figure 5.** MS data of farnesiferol B (**27**) (ThermoLTQiontrap; HESI; 275°C Capillary Temp; 300°C Source Heater Temp; Sheath Gas Flow 40.00; Aux Gas Flow 10.00; Sweep Gas Flow 10.00; Positive Source Voltage 3.70 kV; 100.00 uA Source Current; 18.00 V Capillary Voltage; 90.00 V Tube Lens)

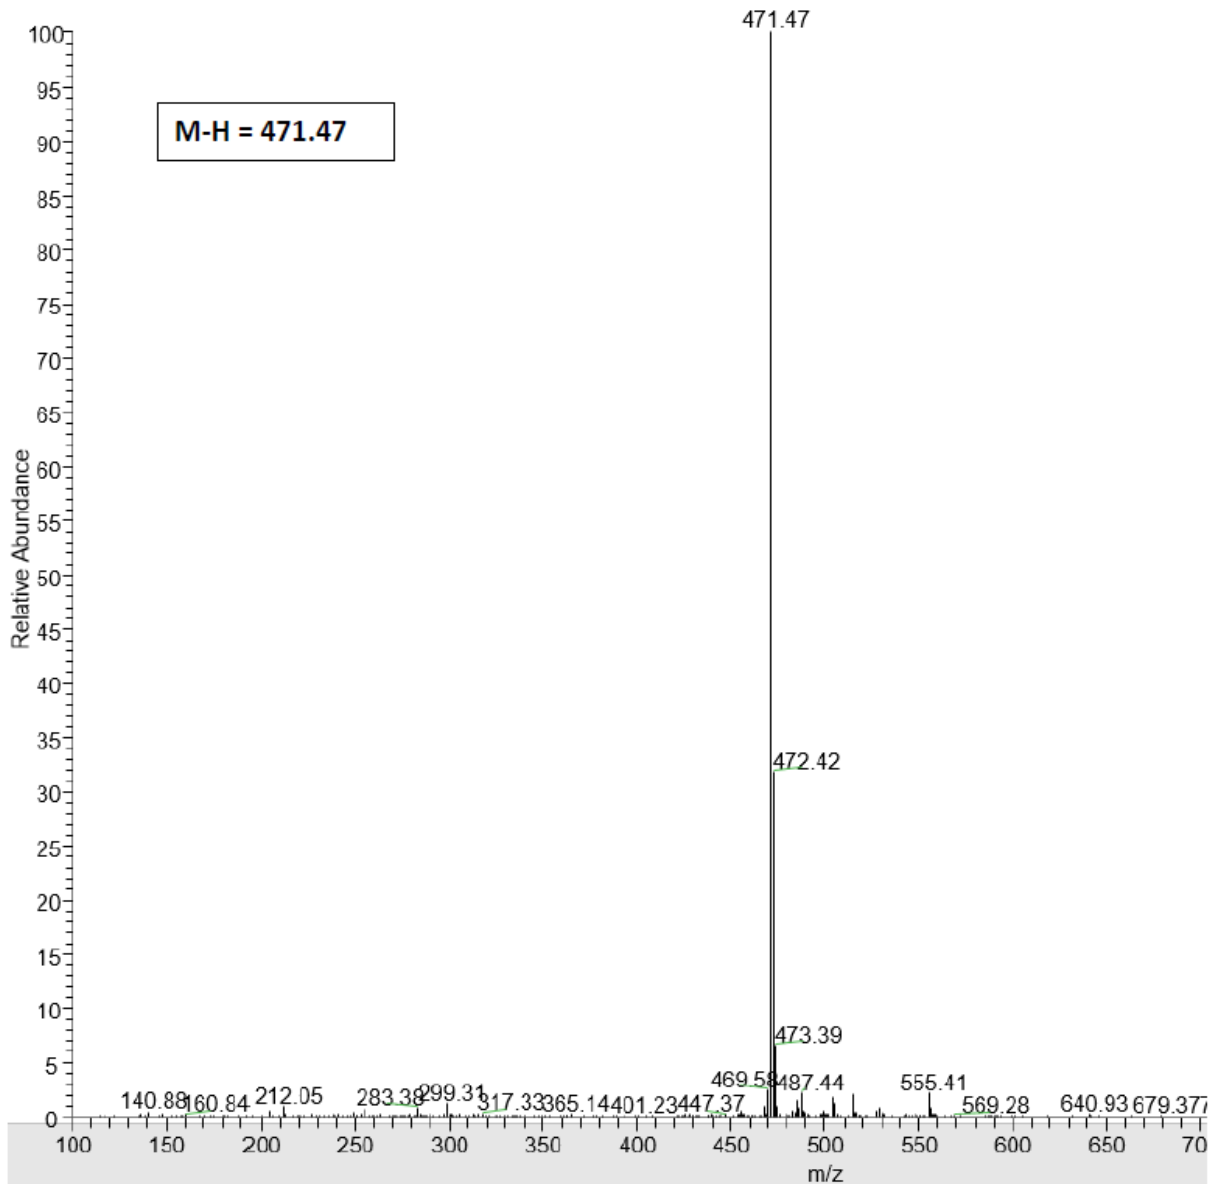

**Supplementary Figure 6.** MS data of alphitolic acid (**52**) (ThermoLTQiontrap; HESI; 275°C Capillary Temp; 300°C Source Heater Temp; Sheath Gas Flow 40.00; Aux Gas Flow 10.00; Sweep Gas Flow 10.00; Positive Source Voltage 3.70 kV; 100.00 uA Source Current; -30.00 V Capillary Voltage; -110.00 V Tube Lens)

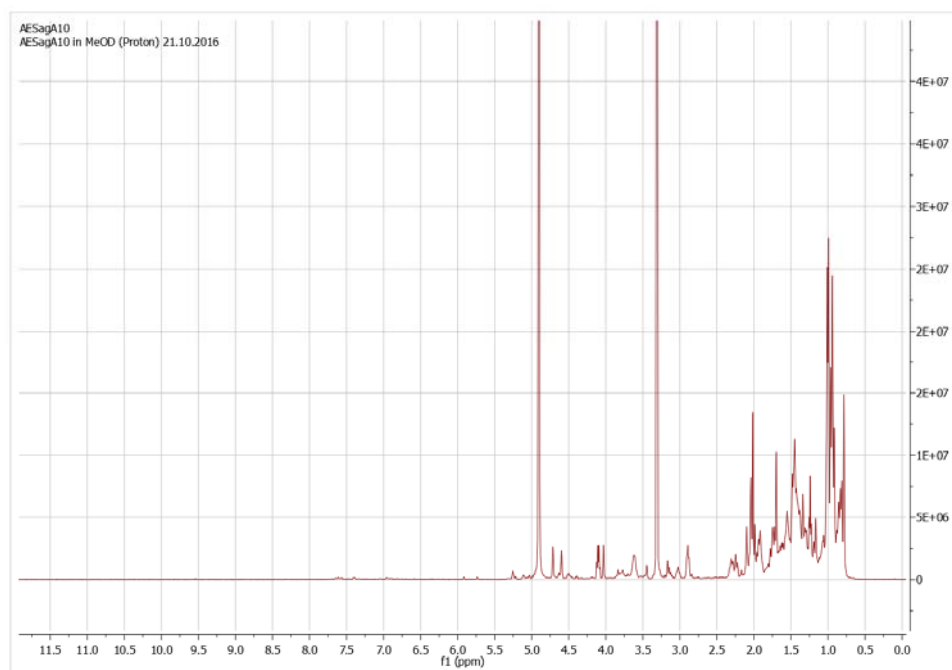

**Supplementary Figure 7.**  $^1\text{H-NMR}$  spectrum of 52 ( $\text{CD}_3\text{OD}$ , ref.:  $\delta\text{H}$  3.31 ppm, 500 MHz NMR,  $\sim 2$  mg)

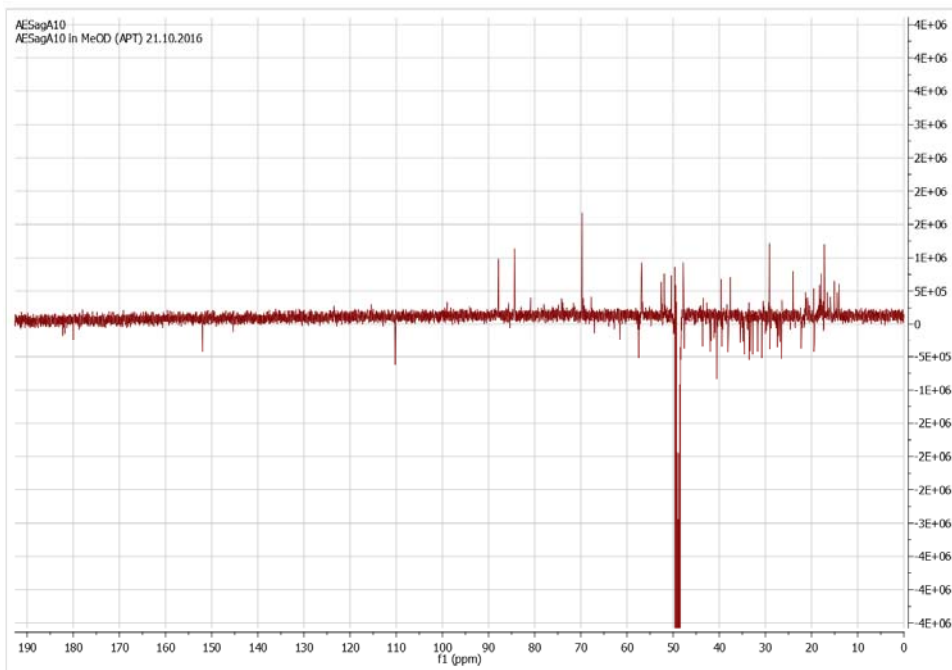

**Supplementary Figure 8.**  $^{13}\text{C-APT}$  spectrum of 52 ( $\text{CD}_3\text{OD}$ , ref.:  $\delta\text{C}$  49.00 ppm, 500 MHz NMR,  $\sim 2$  mg)

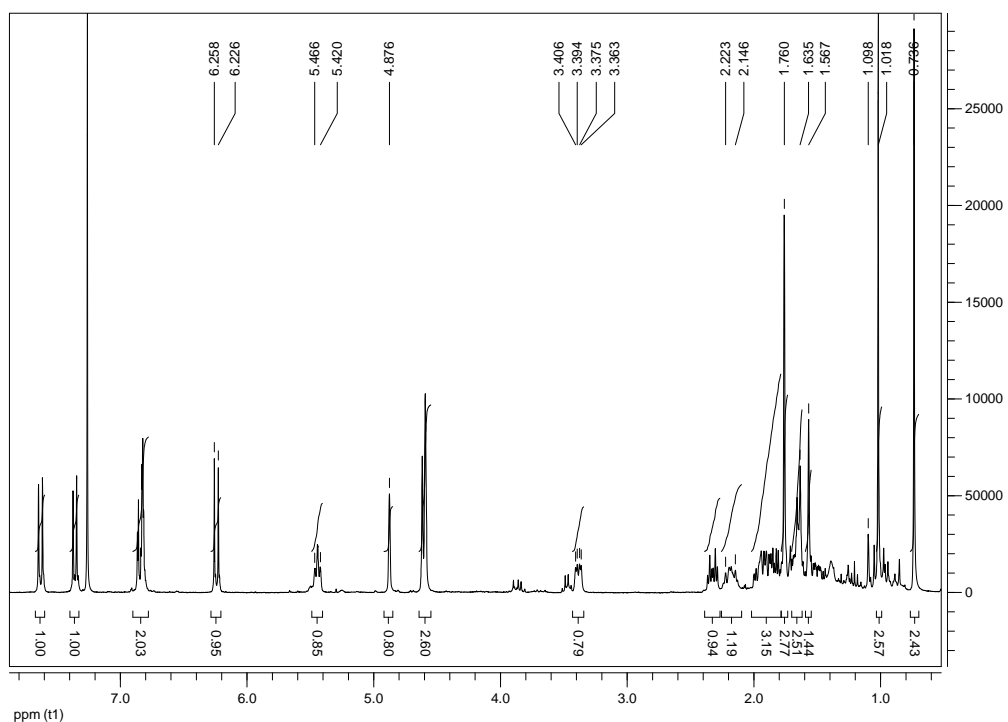

**Supplementary Figure 9.** <sup>1</sup>H-NMR of **27** (CDCl<sub>3</sub>, ref.: δH 7.26 ppm, 300 MHz NMR, 5.6mg)

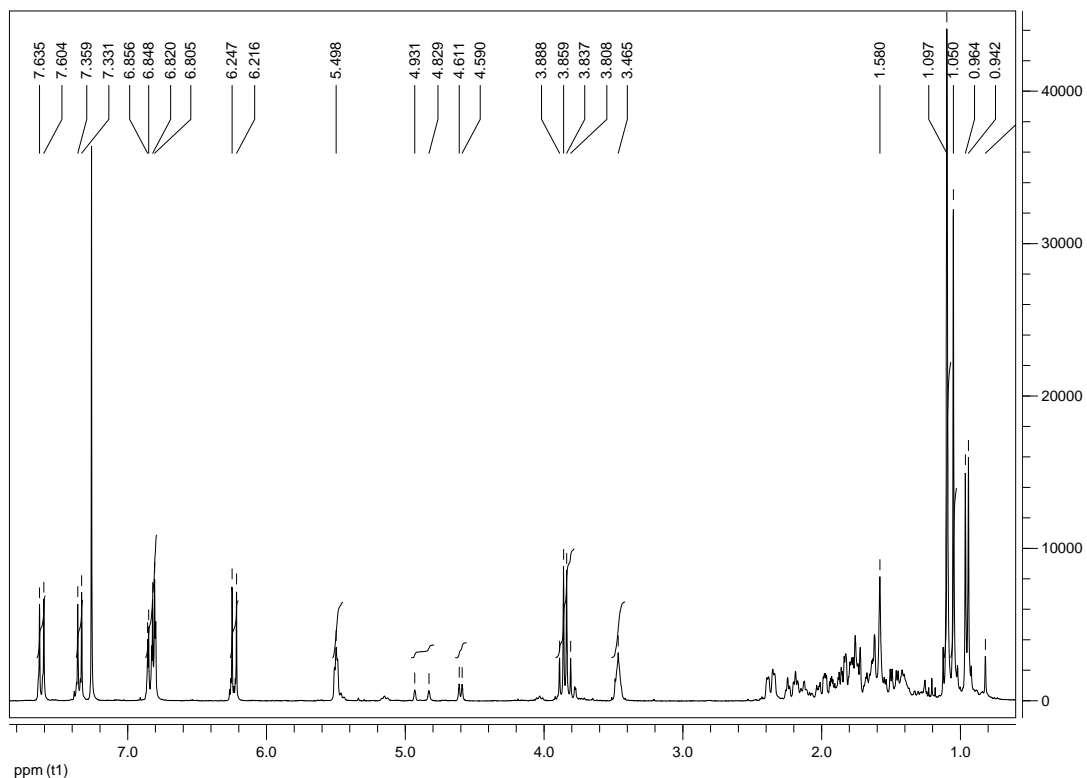

**Supplementary Figure 10.** <sup>1</sup>H-NMR of **28** (CDCl<sub>3</sub>, ref.: δH 7.26 ppm, 300 MHz NMR, 5.6mg)
